# Supplementary material
Source: PubMed Central journal article supplement (PMC1773173)
Supplement: gut_50_4_568__1.pdf [file gut_50_4_568__1.pdf]

Table A1 Available data of the diagnostic and necropsy records in the hospitals in the two cities

|                    | In patient diagnoses | Necropsies      | %Rate (mean (range)) | First diagnosis of |       |
|--------------------|----------------------|-----------------|----------------------|--------------------|-------|
|                    |                      |                 |                      | GU                 | DU    |
| London             |                      |                 |                      |                    |       |
| Charing Cross      | 1869–80              | 1871–8          | 77 (55–94)           | ≤1869              | >1888 |
| Guy's              | 1843–6, 1853         |                 |                      | 1844               | >1872 |
|                    | 1869–72              | –               | –                    |                    |       |
| King's College     | 1894–1901            | 1894–1900       | 98 (46–115)          | ≤1894              | ≤1895 |
| London             | 1863                 |                 |                      | 1864               | >1875 |
|                    | 1875–7               | –               | –                    |                    |       |
| Middlesex          | 1867–1913            | 1855, 1867–1913 | 85 (57–95)           | ≤1855              | ≤1855 |
| Royal Free         | 1904–38              | –               | –                    | ≤1904              | ≤1904 |
| St Bartholomew's   | 1866–1971            | 1869–1951       | 70 (53–100)          | ≤1860              | ≤1870 |
| St George's        | 1854–1879            | 1841–50         | 99.6                 | 1854               | 1875  |
|                    |                      | 1877–79         | 82                   |                    |       |
|                    |                      | 1907–15         | 83                   |                    |       |
| St Mary's          | 1852–1861            | 1851–52         | 97                   | 1860               | >1868 |
|                    | 1868                 | 1859–86         | 68 (36–82)           |                    |       |
| St Thomas'         | 1861–1915            |                 |                      | 1871               | 1873  |
|                    | 1921–35              | –               | –                    |                    |       |
| University College | 1871–88              | 1871            |                      |                    |       |
|                    | 1893–1915            | 1901–15         | 91 (71–113)          | 1872               | 1884  |
| Westminster        | 1799–1801            |                 |                      |                    |       |
|                    | 1870–1932            | 1888–1932       | 94 (73–112)          | 1873               | 1872  |
| New York           |                      |                 |                      |                    |       |
| Bellevue group     | 1848–55, 1861–5      | 1878–84         | 10                   |                    |       |
|                    | 1887, 1902–30        | 1914            | 11 23 (10–37)        | ≤1848              | ≤1902 |
|                    |                      | 1934            | 35                   |                    |       |
|                    |                      | 1973            | 37                   |                    |       |
| Beth Israel        | 1892–4, 1896–1904    | –               |                      | 1896               | >1904 |
| Brooklyn City      | 1846–1901            | –               |                      | 1856               | 1896  |
| German, Brooklyn   | 1908–10              | 1909–10         | 5 (4–6)              | ≤1908              | ≤1909 |
|                    | 1913–4               |                 |                      |                    |       |
| German, New York   | 1870–1915            | 1887–1915       | 24 (12–39)           | 1871               | 1886  |
| Mount Sinai        | 1856–1906            | 1916–77         | 47 (21–70)           | 1873               | 1885  |
| New York           | 1795–1906            |                 |                      | 1876               | 1895  |
|                    |                      | 1881–86         | 77 (70–84)           |                    |       |
|                    |                      | 1905–7          | 31 (28–37)           |                    |       |
| Presbyterian       | 1872–1912            | 1873–1916       | 41 (20–80)           | 1874               | 1884  |
| Roosevelt          | 1888–1909            | 1901–3, 1909    | 27 (18–39)           | ≤1889              | 1895  |
| St Luke's          | 1859–1911            | 1886–1911       | 34 (10–67)           | ≤1859              | 1861  |

GU, gastric ulcer; DU, duodenal ulcer.
